# Supplementary material for: Apoptotic Killing of HIV-1–Infected Macrophages Is Subverted by the Viral Envelope Glycoprotein
Source: PLOS journal article supplement (doi:10.1371/journal.ppat.0030134), 2007-09-26

Figure S1

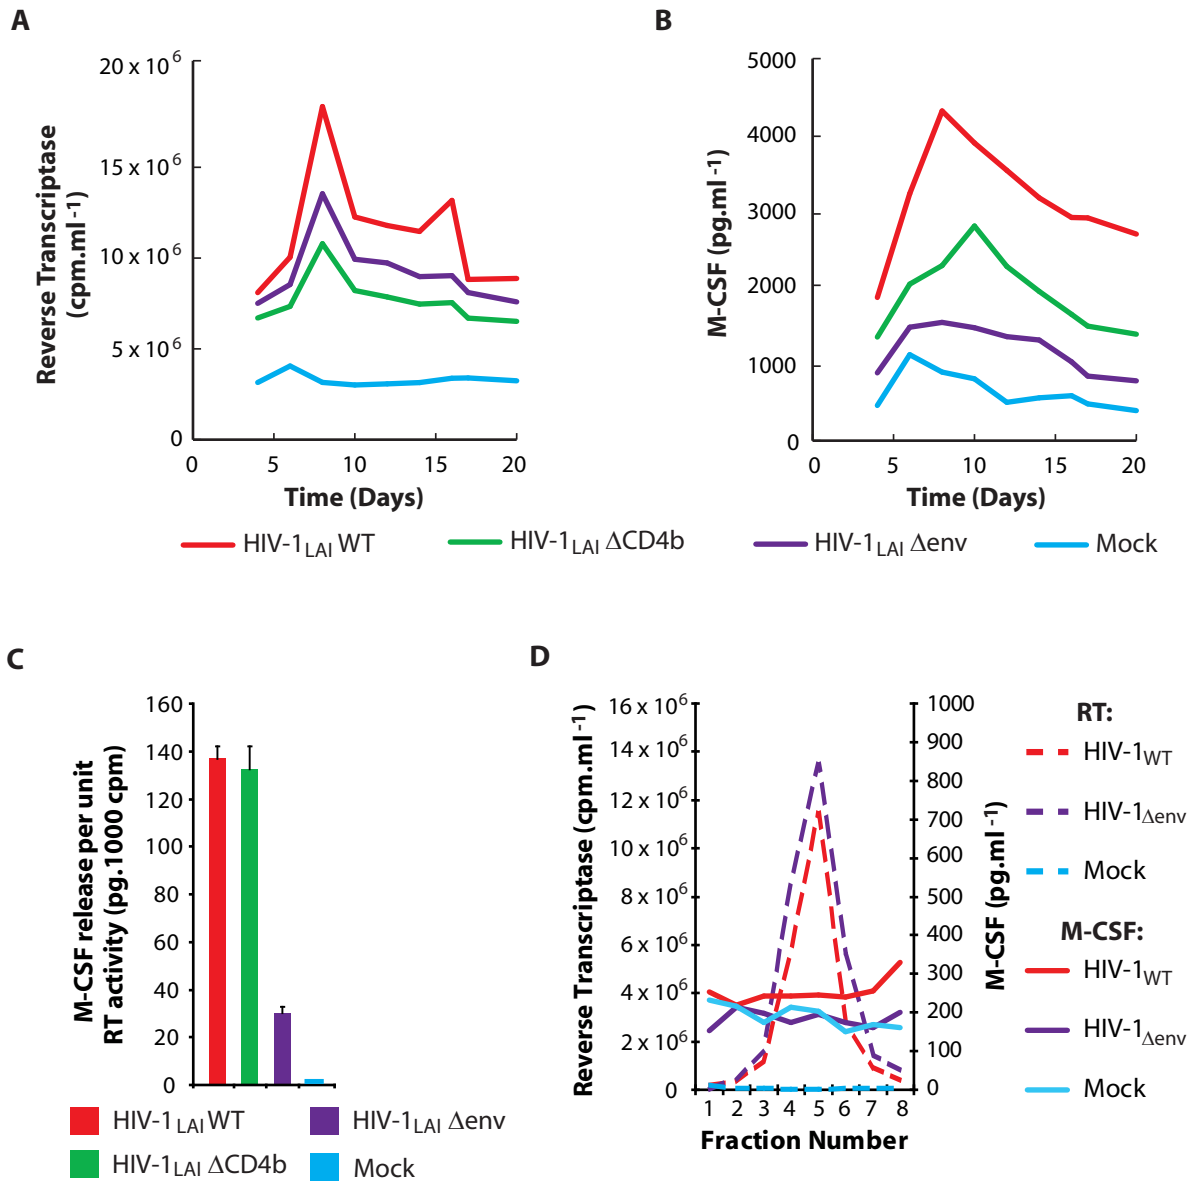

Supplement: S1 (10.1371/journal.ppat.0030134.s001) [file journal.ppat.0030134.s001]
